# Supplementary material for: Molecular, Immunological, and Clinical Features Associated With Lymphoid Neogenesis in Muscle Invasive Bladder Cancer
Source: PubMed Central journal article supplement (PMC8821902; doi:10.3389/fimmu.2021.793992), 2022-01-25
Supplement: DataSheet_1.pdf [file DataSheet_1.pdf]

**Supplemental Table 1. Clinical and histological characteristics of the TCGA MIBC cohort**

| Characteristic             | N   | n (%)     | Time to Death   |                     |         |
|----------------------------|-----|-----------|-----------------|---------------------|---------|
|                            |     |           | HR <sup>†</sup> | 95% CI <sup>†</sup> | p-value |
| Stage                      | 303 |           |                 |                     |         |
| I+II                       |     | 89 (29%)  | —               | —                   |         |
| III                        |     | 102 (34%) | 1.94            | 0.95, 3.94          | 0.069   |
| IV                         |     | 112 (37%) | 4.16            | 2.16, 8.03          | <0.001  |
| Incidental prostate cancer | 249 | 60 (24%)  |                 |                     |         |
| NO                         |     |           | —               | —                   |         |
| YES                        |     |           | 1.05            | 0.63, 1.76          | 0.84    |
| Histological subtype       | 299 |           |                 |                     |         |
| Non-Papillary              |     | 212 (71%) | —               | —                   |         |
| Papillary                  |     | 87 (29%)  | 0.68            | 0.39, 1.17          | 0.16    |
| Angiolymphatic invasion    | 212 | 112 (53%) | 2.90            | 1.68, 5.02          | <0.001  |
| Adjuvant treatment         | 192 | 56 (29%)  | 0.92            | 0.53, 1.60          | 0.76    |
| Neoadjuvant treatment      | 304 | 9 (3.0%)  |                 |                     |         |
| No                         |     |           | —               | —                   |         |
| Yes                        |     |           | 1.05            | 0.26, 4.28          | 0.95    |
| Gender                     | 304 |           |                 |                     |         |
| FEMALE                     |     | 80 (26%)  | —               | —                   |         |
| MALE                       |     | 224 (74%) | 1.08            | 0.67, 1.74          | 0.74    |
| TLS density                | 304 | 152 (50%) | 0.55            | 0.35, 0.85          | 0.007   |
| Germinal centres           | 304 | 114 (38%) | 0.76            | 0.49, 1.19          | 0.23    |
| TMB                        | 303 | 150 (50%) | 0.53            | 0.34, 0.82          | 0.004   |
| TLS-TMB score              | 303 |           |                 |                     |         |
| HiHi                       |     | 85 (28%)  | —               | —                   |         |
| Other                      |     | 218 (72%) | 2.56            | 1.44, 4.56          | 0.001   |

<sup>†</sup> HR = Hazard Ratio, CI = Confidence Interval
