# Supplementary material for: Molecular, Immunological, and Clinical Features Associated With Lymphoid Neogenesis in Muscle Invasive Bladder Cancer
Source: PubMed Central journal article supplement (PMC8821902; doi:10.3389/fimmu.2021.793992), 2022-01-25
Supplement: DataSheet_3.pdf [file DataSheet_3.pdf]

**Supplementary Table 3. Multivariate Cox regression analysis**

| <b>Model 1</b>            | <b>HR</b> | <b>95% CI</b> |              | <b>P-value</b> |
|---------------------------|-----------|---------------|--------------|----------------|
|                           |           | <b>lower</b>  | <b>upper</b> |                |
| TLS density (High vs Low) | 0.6005    | 0.3836        | 0.9398       | 0.0256         |
| TMB (High vs Low)         | 0.5752    | 0.3699        | 0.8945       | 0.0141         |

  

| <b>Model 2</b>                | <b>HR</b> | <b>95% CI</b> |              | <b>P-value</b> |
|-------------------------------|-----------|---------------|--------------|----------------|
|                               |           | <b>lower</b>  | <b>upper</b> |                |
| Stage III vs Stage I+II       | 1.5296    | 0.6349        | 3.685        | 0.34349        |
| Stage IV vs Stage I+II+III    | 3.9783    | 1.6443        | 9.625        | 0.00219        |
| Vascular invasion (Yes vs No) | 1.9154    | 1.0621        | 3.454        | 0.03075        |
| TLS density (High vs Low)     | 0.8096    | 0.4659        | 0.4659       | 1.407          |
| TMB (High vs Low)             | 0.6108    | 0.3582        | 1.041        | 0.07011        |
