# Supplementary material for: Molecular, Immunological, and Clinical Features Associated With Lymphoid Neogenesis in Muscle Invasive Bladder Cancer
Source: PubMed Central journal article supplement (PMC8821902; doi:10.3389/fimmu.2021.793992), 2022-01-25
Supplement: DataSheet_4.pdf [file DataSheet_4.pdf]

**Supplementary Table 4. Spearman correlation analysis between d-TLS density and expression of identified TLS-associated DEGs**

| Gene                    | Spearman R   | p value         |
|-------------------------|--------------|-----------------|
| IL24                    | 0.28844449   | 3.24E-07        |
| CR2                     | 0.28671834   | 3.83E-07        |
| SH2D2A                  | 0.28668749   | 3.84E-07        |
| <b>122genesignature</b> | <b>0.285</b> | <b>3.84E-07</b> |
| ZBED2                   | 0.28299554   | 5.49E-07        |
| FCRLA                   | 0.27654539   | 1.01E-06        |
| FDCSP                   | 0.27382158   | 1.30E-06        |
| SSTR3                   | 0.26838812   | 2.14E-06        |
| LAIR2                   | 0.26785135   | 2.25E-06        |
| IL22RA2                 | 0.26777981   | 2.26E-06        |
| ZC3H12D                 | 0.26489078   | 2.93E-06        |
| FOXP3                   | 0.26368469   | 3.26E-06        |
| HRCT1                   | 0.26072707   | 4.24E-06        |
| MYO1G                   | 0.25849666   | 5.15E-06        |
| FCRL3                   | 0.25759016   | 5.57E-06        |
| LTF                     | 0.25699061   | 5.86E-06        |
| TCL1A                   | 0.2566479    | 6.04E-06        |
| RHOH                    | 0.25645447   | 6.14E-06        |
| KLHDC7B.DT              | 0.25578563   | 6.51E-06        |
| SLAMF1                  | 0.25320206   | 8.11E-06        |
| NCF1C                   | 0.25286745   | 8.35E-06        |
| CD79A                   | 0.25127222   | 9.55E-06        |
| CNR2                    | 0.25118279   | 9.63E-06        |
| CTLA4                   | 0.25079578   | 9.95E-06        |
| MS4A1                   | 0.25003749   | 1.06E-05        |
| LINC01215               | 0.24942167   | 1.12E-05        |
| ICOS                    | 0.24492247   | 1.62E-05        |
| CD6                     | 0.24489562   | 1.62E-05        |
| CXCL10                  | 0.24323193   | 1.86E-05        |
| HNRNPA1P21              | 0.24202091   | 2.05E-05        |
| CD27                    | 0.2416122    | 2.12E-05        |
| TYMP                    | 0.23916187   | 2.59E-05        |
| U62317.3                | 0.23915119   | 2.59E-05        |
| CCL21                   | 0.23855848   | 2.72E-05        |
| CD3D                    | 0.23830416   | 2.77E-05        |
| MMP12                   | 0.23750557   | 2.95E-05        |
| FCAMR                   | 0.23712602   | 3.04E-05        |
| AC004847.1              | 0.23660581   | 3.17E-05        |
| SHISAL2A                | 0.23655046   | 3.19E-05        |
| LTB                     | 0.23570452   | 3.41E-05        |
| SLA                     | 0.23552684   | 3.45E-05        |
| FUT7                    | 0.23470089   | 3.69E-05        |
| CYTIP                   | 0.23461247   | 3.71E-05        |
| SCML4                   | 0.23411677   | 3.86E-05        |
| TRBV5.1                 | 0.23335132   | 4.10E-05        |
| TRBV7.9                 | 0.23289309   | 4.25E-05        |
| CXCL13                  | 0.2327601    | 4.29E-05        |
| IL7R                    | 0.23230488   | 4.45E-05        |
| MAP4K1                  | 0.23228916   | 4.45E-05        |
| TRAC                    | 0.23218995   | 4.49E-05        |
| TRBV28                  | 0.23188439   | 4.59E-05        |
| CD3E                    | 0.2314565    | 4.75E-05        |
| CD2                     | 0.23142744   | 4.76E-05        |
| BLK                     | 0.23138405   | 4.78E-05        |
| AC007384.1              | 0.23058252   | 5.08E-05        |
| NCF1                    | 0.23024764   | 5.21E-05        |
| TNFRSF9                 | 0.22990162   | 5.35E-05        |
| ADAMDEC1                | 0.2294331    | 5.55E-05        |
| ITK                     | 0.22913159   | 5.68E-05        |
| PDCD1                   | 0.22911815   | 5.69E-05        |
| TIGIT                   | 0.22834366   | 6.03E-05        |
| SAMSN1                  | 0.22790525   | 6.24E-05        |
| CD7                     | 0.22771128   | 6.33E-05        |
| TIFAB                   | 0.22638373   | 7.01E-05        |

|            |            |            |
|------------|------------|------------|
| IL21R      | 0.22625301 | 7.08E-05   |
| CD22       | 0.22574879 | 7.35E-05   |
| CXCR6      | 0.2251451  | 7.69E-05   |
| FAM30A     | 0.22496665 | 7.80E-05   |
| CD37       | 0.22325706 | 8.86E-05   |
| CD3G       | 0.22320204 | 8.90E-05   |
| ARHGAP9    | 0.22266816 | 9.26E-05   |
| LINC00402  | 0.22180383 | 9.88E-05   |
| SASH3      | 0.22176856 | 9.90E-05   |
| ADGRG5     | 0.22107014 | 1.04E-04   |
| CLEC4E     | 0.22087821 | 1.06E-04   |
| ZBP1       | 0.22025158 | 1.11E-04   |
| IL2RB      | 0.22007237 | 1.12E-04   |
| KIR2DL4    | 0.21996675 | 1.13E-04   |
| JCHAIN     | 0.21990168 | 1.14E-04   |
| SH2D1A     | 0.2192413  | 1.19E-04   |
| FCRL5      | 0.21922079 | 1.20E-04   |
| TBC1D10C   | 0.21891206 | 1.22E-04   |
| IL16       | 0.21877436 | 1.24E-04   |
| TNFRSF13B  | 0.21798514 | 1.31E-04   |
| CD19       | 0.21787345 | 1.32E-04   |
| BIRC3      | 0.21755748 | 1.35E-04   |
| IGLC2      | 0.21689135 | 1.42E-04   |
| MZB1       | 0.21660614 | 1.45E-04   |
| CHRM3.AS2  | 0.21604155 | 1.51E-04   |
| PYHIN1     | 0.21602391 | 1.51E-04   |
| P2RY10     | 0.21596881 | 1.51E-04   |
| FCMR       | 0.21575307 | 1.54E-04   |
| TRAF3IP3   | 0.21411774 | 1.73E-04   |
| TNFRSF17   | 0.21402942 | 1.74E-04   |
| TRG.AS1    | 0.21388671 | 1.76E-04   |
| GPR15      | 0.21364117 | 1.79E-04   |
| IRF4       | 0.2135947  | 1.80E-04   |
| SLAMF6     | 0.21186663 | 2.03E-04   |
| SPN        | 0.21154418 | 2.08E-04   |
| SP140      | 0.21040505 | 2.25E-04   |
| IGKV1.5    | 0.21029925 | 2.27E-04   |
| TRGC2      | 0.21022964 | 2.28E-04   |
| JAML       | 0.209556   | 2.39E-04   |
| AC243960.1 | 0.20761539 | 2.74E-04   |
| CORO1A     | 0.20719332 | 2.82E-04   |
| ZNF831     | 0.20682404 | 2.89E-04   |
| ITGAL      | 0.20564499 | 3.14E-04   |
| LINC02397  | 0.20506237 | 3.27E-04   |
| CXorf65    | 0.20405955 | 3.50E-04   |
| ZFP57      | 0.20054938 | 4.44E-04   |
| TRBV20.1   | 0.20008514 | 4.58E-04   |
| LY9        | 0.19875771 | 5.01E-04   |
| ART3       | 0.19869394 | 5.03E-04   |
| ZAP70      | 0.1984972  | 5.10E-04   |
| CFP        | 0.19277533 | 7.42E-04   |
| CD5        | 0.1922787  | 7.67E-04   |
| FCER2      | 0.19119928 | 8.22E-04   |
| TRGC1      | 0.19082483 | 8.42E-04   |
| TNFSF8     | 0.19073225 | 8.47E-04   |
| LINC00861  | 0.19048271 | 8.60E-04   |
| IGHA1      | 0.187115   | 0.00106571 |
| THEM5      | 0.18503627 | 0.00121396 |
| RIPOR2     | 0.17280546 | 0.00254187 |
| NDRG4      | -0.1343524 | 0.01930399 |
