# Supplementary material for: Molecular, Immunological, and Clinical Features Associated With Lymphoid Neogenesis in Muscle Invasive Bladder Cancer
Source: PubMed Central journal article supplement (PMC8821902; doi:10.3389/fimmu.2021.793992), 2022-01-25
Supplement: DataSheet_5.pdf [file DataSheet_5.pdf]

**Supplementary Table 5. Expression of TLS-derived genes in d-TLS and c-TLS group comparisons**

| Gene name  | d-TLS <sup>high</sup> vs d-TLS <sup>low</sup> |                 | c-TLS <sup>+</sup> vs c-TLS <sup>-</sup> |                 |
|------------|-----------------------------------------------|-----------------|------------------------------------------|-----------------|
|            | logFC d-TLS                                   | adj.P.Val d-TLS | logFC c-TLS                              | adj.P.Val c-TLS |
| AC007384.1 | 0.872                                         | 0.030541948     | 1.178287882                              | 0.014966521     |
| AC243960.1 | 0.766                                         | 0.034498733     | 1.305786655                              | 0.001874005     |
| ARHGAP9    | 0.717                                         | 0.034498733     | 1.023727984                              | 0.012935631     |
| BLK        | 1.372                                         | 0.023096175     | 2.999993666                              | 1.02E-08        |
| CCL21      | 1.740                                         | 0.030541948     | 2.467032641                              | 8.94E-04        |
| CD19       | 1.128                                         | 0.038640763     | 2.553428209                              | 1.11E-06        |
| CD22       | 0.963                                         | 0.032736882     | 2.049597913                              | 6.42E-06        |
| CD27       | 0.841                                         | 0.02886061      | 1.28040993                               | 0.002435367     |
| CD37       | 0.718                                         | 0.042243638     | 1.358567692                              | 1.55E-04        |
| CD3D       | 0.914                                         | 0.030541948     | 1.059954062                              | 0.046449536     |
| CD3E       | 0.868                                         | 0.032736882     | 1.187171449                              | 0.011701773     |
| CD5        | 0.763                                         | 0.034498733     | 1.26094074                               | 0.002592644     |
| CD79A      | 1.330                                         | 0.021558444     | 2.469643593                              | 8.59E-07        |
| CFP        | 0.647                                         | 0.032736882     | 1.145721638                              | 0.001353552     |
| CNR2       | 1.025                                         | 0.032274422     | 2.482673466                              | 1.33E-08        |
| CORO1A     | 0.593                                         | 0.032736882     | 0.889651192                              | 0.014731472     |
| CR2        | 1.627                                         | 0.030977192     | 3.17973621                               | 2.71E-06        |
| CXCL13     | 1.397                                         | 0.033475531     | 2.044055924                              | 0.001361107     |
| CYTIP      | 0.805                                         | 0.030541948     | 1.075907191                              | 0.011830381     |
| FAM30A     | 1.176                                         | 0.032736882     | 2.399980319                              | 8.86E-06        |
| FCAMR      | 1.203                                         | 0.031710633     | 2.065250428                              | 2.49E-04        |
| FCER2      | 1.185                                         | 0.038640763     | 2.700603153                              | 6.64E-07        |
| FCMR       | 0.647                                         | 0.037999581     | 1.265996339                              | 1.49E-04        |
| FCRL3      | 1.160                                         | 0.030732204     | 2.403375987                              | 2.09E-06        |
| FCRL5      | 1.228                                         | 0.042243638     | 2.163899175                              | 7.47E-04        |
| FCRLA      | 1.215                                         | 0.030541948     | 1.84277643                               | 0.00228431      |
| FDCSP      | 1.939                                         | 0.023096175     | 2.723915218                              | 7.47E-04        |
| FUT7       | 0.873                                         | 0.030977192     | 1.092153216                              | 0.033909982     |
| GPR15      | 1.089                                         | 0.031477536     | 1.441356736                              | 0.019633541     |
| IGHA1      | 1.216                                         | 0.030541948     | 1.627269904                              | 0.00467396      |
| IGKV1-5    | 1.092                                         | 0.032736882     | 1.466208482                              | 0.013860513     |
| IGLC2      | 0.923                                         | 0.032736882     | 1.180261585                              | 0.040358405     |
| IL16       | 0.626                                         | 0.048333874     | 1.192975806                              | 3.23E-04        |
| IL7R       | 0.925                                         | 0.034498733     | 1.270965185                              | 0.012336134     |
| IRF4       | 0.867                                         | 0.034498733     | 1.417110711                              | 0.003228812     |
| ITGAL      | 0.776                                         | 0.033704908     | 1.062142393                              | 0.016236913     |
| ITK        | 0.927                                         | 0.030541948     | 1.424335226                              | 0.003080852     |
| JAML       | 0.696                                         | 0.032274422     | 1.182940337                              | 7.49E-04        |
| JCHAIN     | 1.311                                         | 0.031710633     | 1.802367561                              | 0.00765034      |
| LINC00861  | 0.896                                         | 0.033475531     | 1.598784605                              | 6.72E-04        |
| LINC01215  | 0.976                                         | 0.032736882     | 1.357613735                              | 0.013893152     |
| LINC01857  | 0.931                                         | 0.04518225      | 1.87511346                               | 8.53E-05        |
| LINC02397  | 0.945                                         | 0.035349762     | 1.959369602                              | 2.34E-05        |
| LTB        | 0.878                                         | 0.030541948     | 1.523113663                              | 7.45E-05        |
| LTF        | 1.463                                         | 0.032736882     | 2.091790821                              | 0.003026717     |
| LY9        | 0.895                                         | 0.032736882     | 1.669027464                              | 2.81E-04        |
| MAP4K1     | 0.713                                         | 0.021558444     | 0.929160263                              | 0.009869753     |
| MS4A1      | 1.597                                         | 0.029184872     | 3.601907013                              | 5.45E-10        |
| MYO1G      | 0.790                                         | 0.02886061      | 0.976351798                              | 0.021426495     |
| MZB1       | 1.146                                         | 0.034202387     | 1.64006358                               | 0.005608011     |
| NCF1C      | 0.861                                         | 0.03059617      | 1.27325356                               | 0.006627338     |
| P2RY10     | 0.908                                         | 0.037368376     | 1.648402454                              | 6.34E-04        |
| PYHIN1     | 0.861                                         | 0.034202387     | 1.125713742                              | 0.04134723      |
| RHOH       | 0.921                                         | 0.021558444     | 1.404069238                              | 0.001178413     |
| RIPOR2     | 0.670                                         | 0.032736882     | 1.038963171                              | 0.00517162      |
| SAMSN1     | 0.764                                         | 0.032736882     | 1.019021863                              | 0.025045432     |
| SASH3      | 0.744                                         | 0.043666502     | 1.21873843                               | 0.002348739     |
| SCML4      | 0.955                                         | 0.030977192     | 1.369536787                              | 0.007767049     |
| SH2D1A     | 0.943                                         | 0.032736882     | 1.448608019                              | 0.005674541     |
| SLA        | 0.764                                         | 0.032274422     | 1.054721051                              | 0.012633195     |
| SLAMF1     | 1.005                                         | 0.021558444     | 1.348238853                              | 0.006654395     |
| SLAMF6     | 0.972                                         | 0.031842882     | 1.5159603                                | 0.003428206     |
| SPIB       | 1.081                                         | 0.048307882     | 1.979210726                              | 5.58E-04        |
| SPN        | 0.721                                         | 0.038780516     | 0.937311433                              | 0.045855558     |
| TBC1D10C   | 0.733                                         | 0.031477536     | 1.096400994                              | 0.004654983     |
| TCL1A      | 1.683                                         | 0.011885533     | 3.078105032                              | 5.85E-08        |
| TIFAB      | 0.969                                         | 0.037267715     | 1.325569127                              | 0.023849867     |
| TNFRSF13B  | 1.110                                         | 0.032736882     | 2.845266164                              | 4.45E-10        |
| TNFRSF17   | 1.146                                         | 0.032736882     | 1.587852467                              | 0.013739601     |
| TNFSF8     | 0.799                                         | 0.032736882     | 1.365769204                              | 0.001786114     |
| TRAC       | 0.899                                         | 0.032147154     | 1.193809344                              | 0.012932222     |
| TRAF3IP3   | 0.701                                         | 0.030541948     | 1.033466997                              | 0.005479122     |
| TRBV20-1   | 0.922                                         | 0.032736882     | 1.367361491                              | 0.007545772     |
| TRBV28     | 0.921                                         | 0.031477536     | 1.324871342                              | 0.008045264     |
| TRBV5-1    | 1.128                                         | 0.015609525     | 1.470519681                              | 0.00496852      |
| TRBV7-9    | 0.964                                         | 0.033704908     | 1.407881468                              | 0.010494376     |
| ZC3H12D    | 0.820                                         | 0.015609525     | 1.146227829                              | 0.003228812     |
| ZNF831     | 0.944                                         | 0.030541948     | 1.547189946                              | 0.001172653     |
