# Supplementary material for: Molecular, Immunological, and Clinical Features Associated With Lymphoid Neogenesis in Muscle Invasive Bladder Cancer
Source: PubMed Central journal article supplement (PMC8821902; doi:10.3389/fimmu.2021.793992), 2022-01-25
Supplement: DataSheet_6.pdf [file DataSheet_6.pdf]

**Supplementary Table 6. Characteristics of DEGs found uniquely in d-TLS group comparison**

| Gene name  | Expression in TLS-high versus TLS-low TCGA MIBC samples |           | Function or process                                                       | Expression pattern from ProteinAtlas.org, NCBI Gene, gtxportal.org or Genecards.org | Gene type            | Survival associations in urothelial cancer from ProteinAtlas.org | Univariate COX regression on TCGA cohort (as continuous variables) |                  |           |         | Expression in IMvigor210 complete responders vs progressive disease |          |
|------------|---------------------------------------------------------|-----------|---------------------------------------------------------------------------|-------------------------------------------------------------------------------------|----------------------|------------------------------------------------------------------|--------------------------------------------------------------------|------------------|-----------|---------|---------------------------------------------------------------------|----------|
|            | log2FC                                                  | adj.P.Val |                                                                           |                                                                                     |                      |                                                                  | beta                                                               | HR (95% CI)      | Wald test | p.value | log2FC6                                                             | P.Value7 |
| AC004847.1 | 0.818                                                   | 0.031     | lncRNA, unknown                                                           | multiple tissues                                                                    | non protein coding   | NA                                                               | -0.0078                                                            | 0.99 (0.99-1)    | 5.3       | 0.021   | 1.307                                                               | 0.000    |
| ART3       | 0.902                                                   | 0.038     | modification of proteins by adding or removing ADP-ribose                 | Testis, muscle                                                                      | testis-associated    | improved prognosis                                               | -0.0027                                                            | 1 (0.99-1)       | 1.2       | 0.26    | 0.045                                                               | 0.907    |
| BIRC3      | 0.806                                                   | 0.032     | Apoptosis, regulates NFkB cascade, modulates inflammation                 | T cells, B cells, granulocytes                                                      | immune-related       | improved prognosis                                               | -0.00016                                                           | 1 (1-1)          | 5.3       | 0.021   | 0.469                                                               | 0.135    |
| CD2        | 0.906                                                   | 0.033     | adhesion and costimulatory receptor                                       | T cells, NK cells                                                                   | immune-related       | improved prognosis                                               | -0.00048                                                           | 1 (1-1)          | 6.2       | 0.012   | 0.825                                                               | 0.011    |
| CD3G       | 0.734                                                   | 0.045     | activation of downstream pathway upon TCR activation                      | T cells                                                                             | immune-related       | improved prognosis                                               | -0.0019                                                            | 1 (1-1)          | 6.1       | 0.014   | 0.919                                                               | 0.002    |
| CD6        | 0.855                                                   | 0.022     | cell-adhesion, T cell activation                                          | T cells                                                                             | immune-related       | not prognostic                                                   | -0.00041                                                           | 1 (1-1)          | 3         | 0.083   | 0.816                                                               | 0.005    |
| CD7        | 0.865                                                   | 0.032     | regulates adhesion and apoptosis                                          | T cells, NK cells                                                                   | immune-related       | improved prognosis                                               | -0.00065                                                           | 1 (1-1)          | 7.7       | 0.0056  | 0.838                                                               | 0.010    |
| CLEC4E     | 0.959                                                   | 0.033     | pattern recognition receptor                                              | Myeloid cells                                                                       | immune-related       | not prognostic                                                   | -0.00089                                                           | 1 (1-1)          | 1.1       | 0.29    | 0.600                                                               | 0.114    |
| CTLA4      | 1.017                                                   | 0.022     | immune checkpoint                                                         | T cells                                                                             | immune-related       | improved prognosis                                               | -0.0017                                                            | 1 (1-1)          | 6.4       | 0.011   | 0.807                                                               | 0.028    |
| CXCR6      | 0.722                                                   | 0.037     | chemokine receptor, T cell migration in peripheral tissues                | T cells                                                                             | immune-related       | improved prognosis                                               | -0.0015                                                            | 1 (1-1)          | 8.4       | 0.0039  | 0.779                                                               | 0.011    |
| Cxorf65    | 0.773                                                   | 0.037     | unknown                                                                   | Predominantly testis                                                                | testis-associated    | improved prognosis                                               | -0.015                                                             | 0.99 (0.97-1)    | 4         | 0.044   | 0.632                                                               | 0.076    |
| FOXP3      | 0.690                                                   | 0.016     | transcription factor                                                      | T cells                                                                             | immune-related       | not prognostic                                                   | -0.0012                                                            | 1 (1-1)          | 4.7       | 0.031   | 0.460                                                               | 0.082    |
| HRCT1      | 1.085                                                   | 0.011     | unknown                                                                   | multiple tissues                                                                    | nonimmune            | not prognostic                                                   | -0.0004                                                            | 1 (1-1)          | 0.19      | 0.66    | -0.874                                                              | 0.010    |
| ICOS       | 1.002                                                   | 0.031     | co-stimulatory molecule                                                   | T cells                                                                             | immune-related       | improved prognosis                                               | -0.003                                                             | 1 (0.99-1)       | 7.3       | 0.0069  | 0.751                                                               | 0.032    |
| IL21R      | 0.888                                                   | 0.036     | promotion of lymphocyte proliferation and differentiation                 | NK cells, B cells, T cells                                                          | immune-related       | not prognostic                                                   | -0.00046                                                           | 1 (1-1)          | 1.9       | 0.17    | 0.731                                                               | 0.015    |
| IL22RA2    | 1.185                                                   | 0.022     | secreted receptor, inhibits IL22 activity                                 | Syncytiotrophoblast (placenta), B cells                                             | immune-related       | improved prognosis in advanced stage                             | -0.00064                                                           | 1 (1-1)          | 0.27      | 0.6     | 0.303                                                               | 0.493    |
| IL24       | 1.074                                                   | 0.012     | cytokine involved in apoptosis of cancer cells                            | Predominantly immune cells                                                          | immune-related       | improved prognosis                                               | -0.00071                                                           | 1 (1-1)          | 2.4       | 0.12    | -0.147                                                              | 0.813    |
| KIR2DL4    | 1.009                                                   | 0.048     | regulation of NK cell activation                                          | NK cells, T cells                                                                   | immune-related       | improved prognosis                                               | -0.012                                                             | 0.99 (0.98-1)    | 9.8       | 0.0017  | 1.795                                                               | 0.000    |
| LAI2       | 1.124                                                   | 0.011     | soluble receptor, inhibition of platelet and complement activation        | T cells                                                                             | immune-related       | not prognostic                                                   | -0.0086                                                            | 0.99 (0.98-1)    | 2.6       | 0.11    | 0.710                                                               | 0.074    |
| MMP12      | 1.345                                                   | 0.031     | degrades soluble and insoluble elastin                                    | Extravillous Trophoblast, Macrophages, B cells                                      | immune-related       | not prognostic                                                   | -0.000037                                                          | 1 (1-1)          | 1.3       | 0.25    | -0.501                                                              | 0.398    |
| NCF1       | 0.822                                                   | 0.033     | subunit of NADPH oxidase, mediates neutrophil oxidative burst             | Granulocytes, B cells, macrophages                                                  | immune-related       | not prognostic                                                   | -0.0015                                                            | 1 (1-1)          | 4.4       | 0.036   | 0.694                                                               | 0.018    |
| NDRG4      | -0.691                                                  | 0.035     | cell cycle progression and survival                                       | Astrocytes, endothelial and vascular smooth muscle cells                            | nonimmune            | not prognostic                                                   | -0.000038                                                          | 1 (1-1)          | 0         | 0.94    | -0.534                                                              | 0.130    |
| PDCD1      | 1.018                                                   | 0.031     | immune checkpoint                                                         | T cells                                                                             | immune-related       | improved prognosis                                               | -0.0014                                                            | 1 (1-1)          | 4         | 0.046   | 1.244                                                               | 0.000    |
| SH2D2A     | 0.598                                                   | 0.012     | TCR signal transduction                                                   | T cells, NK cells                                                                   | immune-related       | improved prognosis                                               | -0.001                                                             | 1 (1-1)          | 8.2       | 0.0042  | 0.543                                                               | 0.006    |
| THEM5      | 0.637                                                   | 0.042     | involved in fatty acid metabolism                                         | keratinocytes, endothelial cells                                                    | nonimmune            | improved prognosis                                               | -0.00074                                                           | 1 (1-1)          | 1.4       | 0.24    | -0.223                                                              | 0.677    |
| TIGIT      | 0.859                                                   | 0.033     | immune checkpoint                                                         | T cells                                                                             | immune-related       | improved prognosis                                               | -0.00075                                                           | 1 (1-1)          | 5.2       | 0.023   | 0.535                                                               | 0.115    |
| TNFRSF9    | 0.805                                                   | 0.035     | regulation of survival and development of T cells                         | T cells, granulocytes, monocytes                                                    | immune-related       | not prognostic                                                   | -0.00038                                                           | 1 (1-1)          | 0.83      | 0.36    | 0.971                                                               | 0.002    |
| TYMP       | 0.744                                                   | 0.039     | promotion of angiogenesis                                                 | Myeloid cells                                                                       | immune-related       | not prognostic                                                   | -0.000049                                                          | 1 (1-1)          | 10        | 0.0016  | 0.633                                                               | 0.030    |
| ZAP70      | 0.793                                                   | 0.031     | regulation of T cell and B cell activation                                | T cells                                                                             | immune-related       | improved prognosis                                               | -0.00046                                                           | 1 (1-1)          | 3         | 0.086   | 0.702                                                               | 0.017    |
| ZBED2      | 1.366                                                   | 0.024     | antagonist of interferon regulatory factor 1                              | Thyroid, T cells, B cells, alveolar type I cells                                    | immune-related       | worse prognosis                                                  | -0.00015                                                           | 1 (1-1)          | 0.9       | 0.34    | 1.116                                                               | 0.013    |
| ZBP1       | 0.995                                                   | 0.033     | mediates interferon-induced necroptosis                                   | immune cells, melanocytes                                                           | immune-related       | not prognostic                                                   | -0.0009                                                            | 1 (1-1)          | 4.8       | 0.028   | 0.813                                                               | 0.018    |
| ZFP57      | 1.269                                                   | 0.039     | Transcription regulator maintaining maternal and paternal gene imprinting | Brain, muscle                                                                       | nonimmune            | not prognostic                                                   | -0.0004                                                            | 1 (1-1)          | 0.38      | 0.54    | -0.893                                                              | 0.292    |
| ADAMDEC1   | 1.280                                                   | 0.022     | secreted metalloproteinase, immune response regulation                    | Macrophages, B cells                                                                | immune-related       | improved prognosis in advanced stage                             | -0.00028                                                           | 1 (1-1)          | 2.3       | 0.13    |                                                                     |          |
| ADGRG5     | 0.881                                                   | 0.033     | adhesion to GPCR, immune response regulation                              | Immune cells, alveolar epithelial cells                                             | immune-related       | improved prognosis                                               | -0.0027                                                            | 1 (1-1)          | 6.9       | 0.0086  |                                                                     |          |
| CHRM3-AS2  | 0.836                                                   | 0.035     | lncRNA                                                                    | Predominantly testis                                                                | non protein coding   | NA                                                               | -0.0083                                                            | 0.99 (0.98-1)    | 3.1       | 0.078   |                                                                     |          |
| HNRNPA1P21 | 0.725                                                   | 0.034     | pseudogene                                                                | Lymphocytes                                                                         | non protein coding   | NA                                                               | -0.004                                                             | 1 (0.99-1)       | 3.6       | 0.059   |                                                                     |          |
| KLHDC7B-DT | 1.048                                                   | 0.029     | lncRNA                                                                    | multiple tissues                                                                    | maybe immune-related | NA                                                               | -0.0036                                                            | 1 (0.99-1)       | 8.7       | 0.0032  |                                                                     |          |
| LINC00402  | 0.910                                                   | 0.032     | lncRNA, regulator of allogeneic T-cells                                   | Predominantly immune cells                                                          | non protein coding   | NA                                                               | -0.0037                                                            | 1 (0.98-1)       | 0.29      | 0.59    |                                                                     |          |
| SHISAL2A   | 0.784                                                   | 0.024     | unknown                                                                   | Macrophages, T cells                                                                | immune-related       | improved prognosis                                               | -0.0023                                                            | 1 (0.99-1)       | 1.6       | 0.21    |                                                                     |          |
| SSTR3      | 1.046                                                   | 0.022     | somatostatin receptor, regulation of apoptosis                            | predominantly testis and brain                                                      | testis-associated    | improved prognosis                                               | -0.015                                                             | 0.99 (0.97-1)    | 3.7       | 0.054   |                                                                     |          |
| TRG-AS1    | 0.760                                                   | 0.037     | lncRNA, unknown                                                           | immune cells                                                                        | immune-related       | NA                                                               | -0.0054                                                            | 0.99 (0.99-1)    | 6.5       | 0.011   |                                                                     |          |
| TRGC1      | 0.887                                                   | 0.033     | T cell receptor gamma constant 1                                          | gamma delta T cells                                                                 | immune-related       | NA                                                               | -0.02                                                              | 0.98 (0.97-0.99) | 7         | 0.0083  |                                                                     |          |
| TRGC2      | 0.925                                                   | 0.044     | T cell receptor gamma constant 2                                          | gamma delta T cells                                                                 | immune-related       | NA                                                               | -0.0068                                                            | 0.99 (0.99-1)    | 7.1       | 0.0079  |                                                                     |          |
| U62317.3   | 0.948                                                   | 0.022     | lncRNA                                                                    | unknown                                                                             | non protein coding   | NA                                                               | -0.031                                                             | 0.97 (0.95-0.99) | 9.1       | 0.0026  |                                                                     |          |
