# Supplementary material for: Molecular, Immunological, and Clinical Features Associated With Lymphoid Neogenesis in Muscle Invasive Bladder Cancer
Source: PubMed Central journal article supplement (PMC8821902; doi:10.3389/fimmu.2021.793992), 2022-01-25

# Supplementary Figure 7

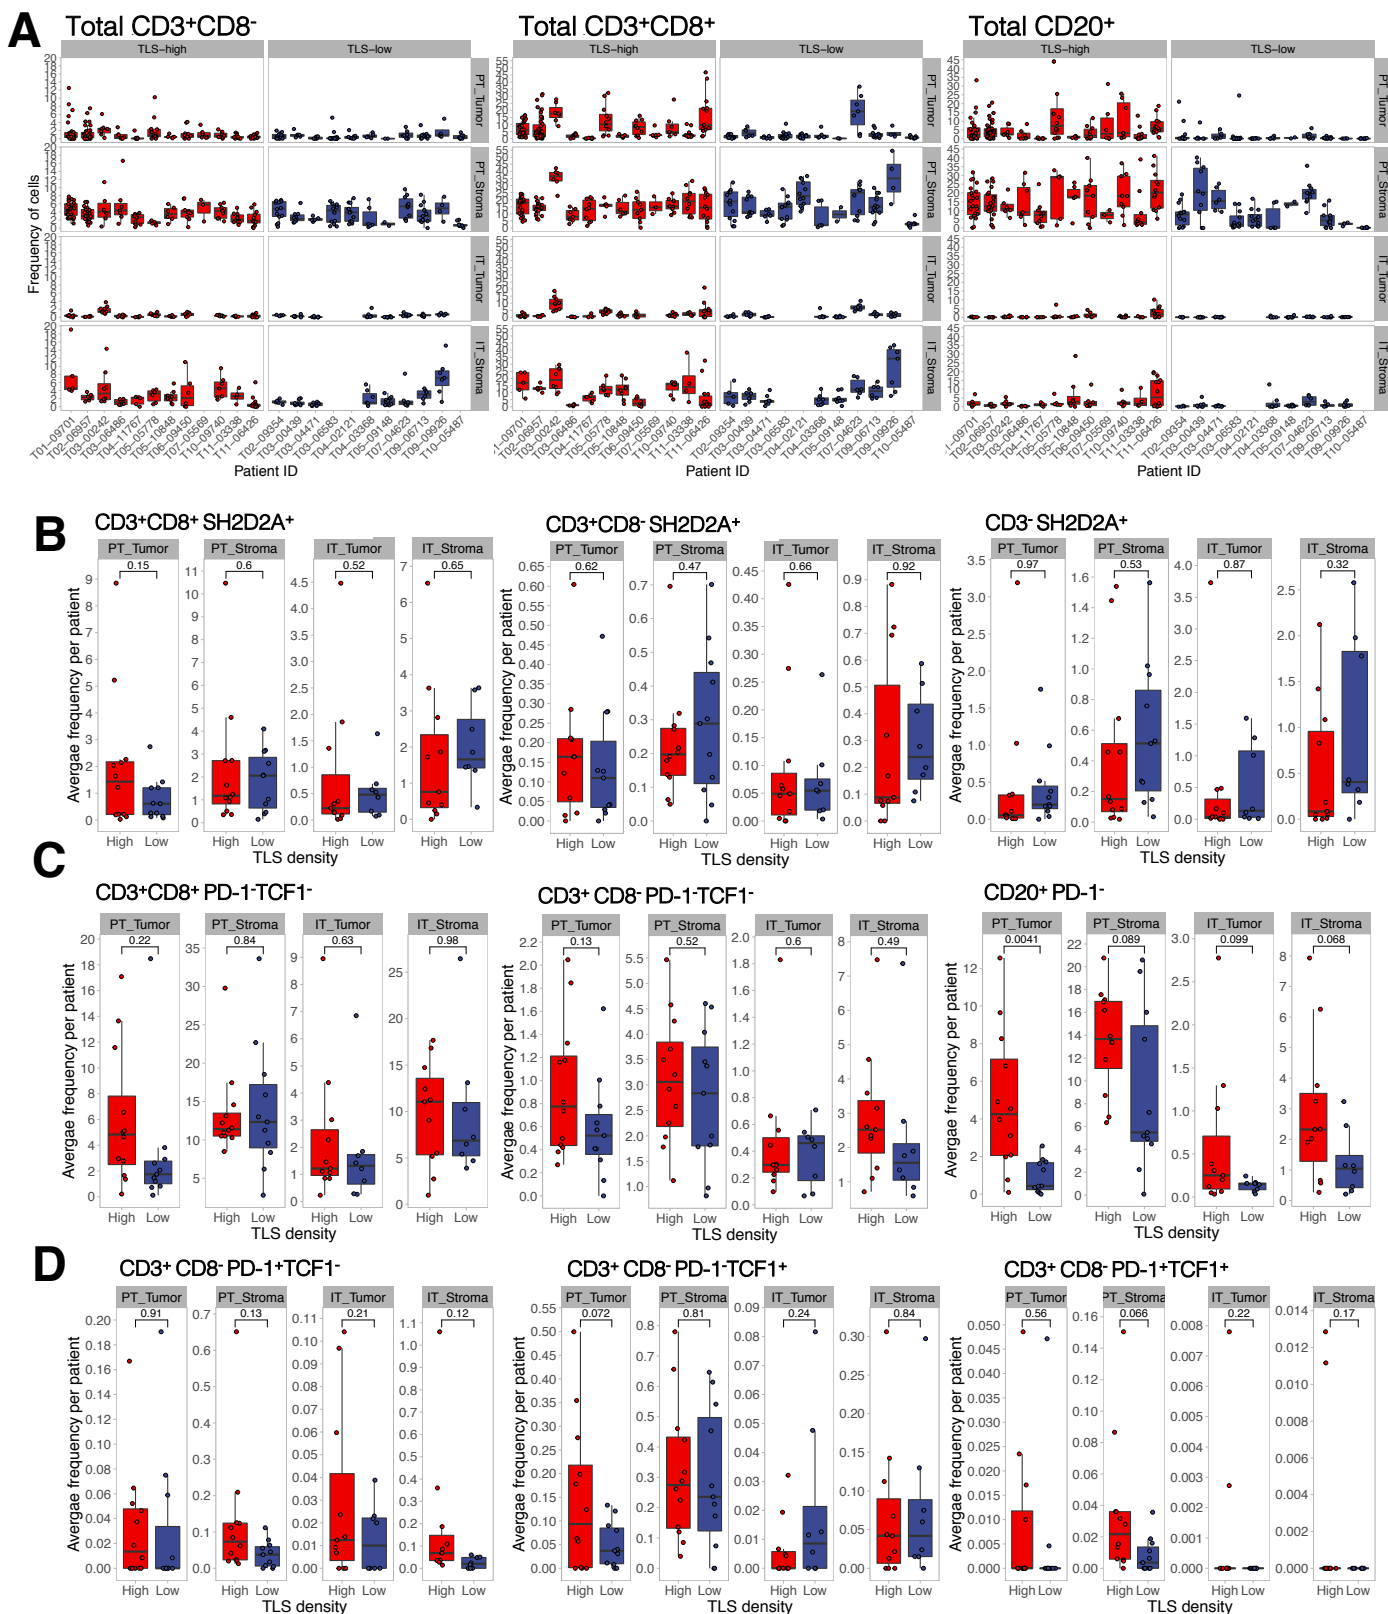

Supplement: DataSheet_14.pdf [file DataSheet_14.pdf]
