# Supplementary material for: Molecular, Immunological, and Clinical Features Associated With Lymphoid Neogenesis in Muscle Invasive Bladder Cancer
Source: PubMed Central journal article supplement (PMC8821902; doi:10.3389/fimmu.2021.793992), 2022-01-25

# Supplementary Figure 8

**A**

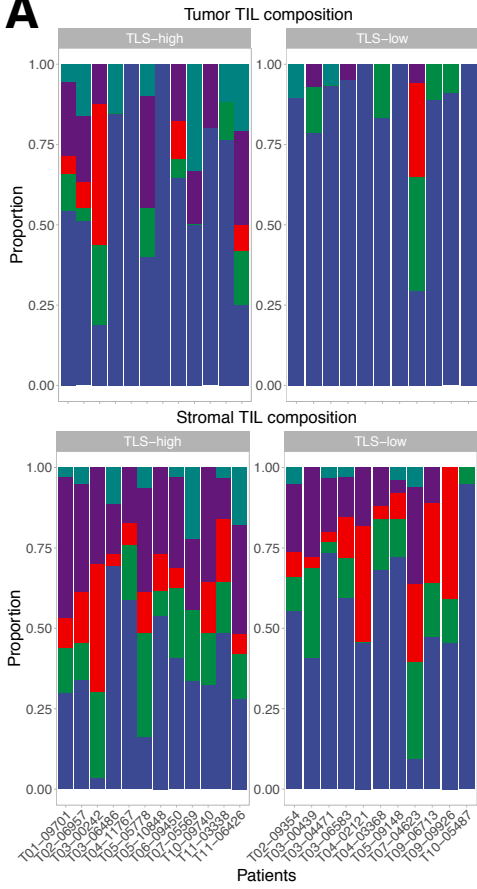

**Immune clusters**

- NI
- CD8hi
- CD8lo
- BT
- Bcells

**B**

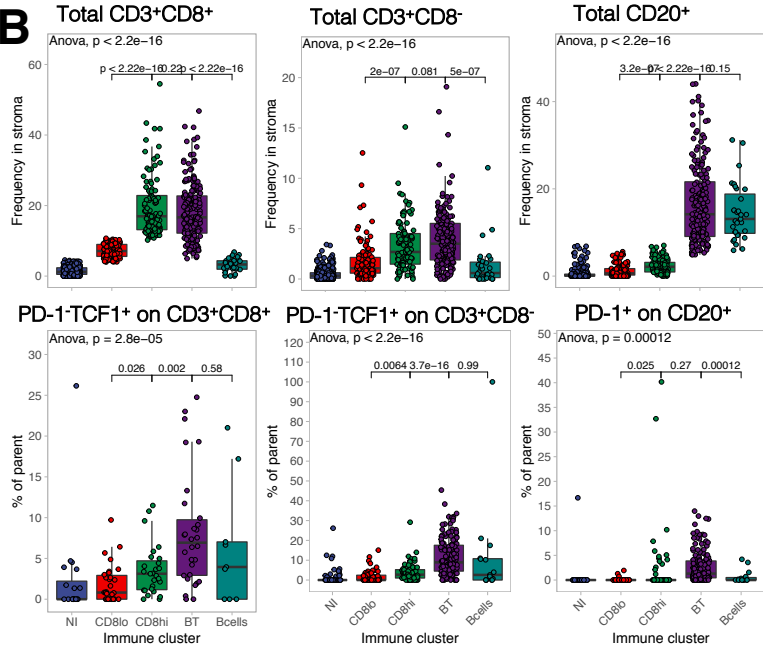

**C**

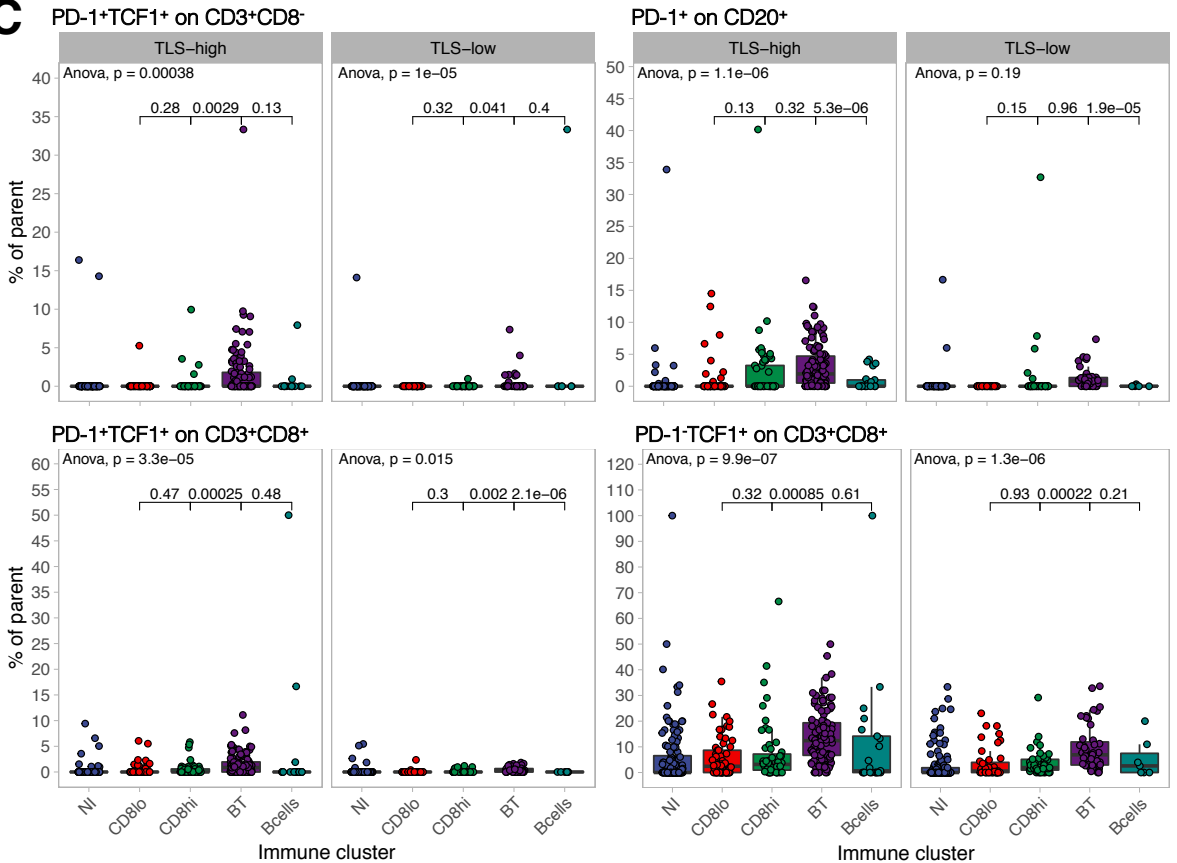

Supplement: DataSheet_15.pdf [file DataSheet_15.pdf]
